# Supplementary material for: Nocturnal Sleep Problems Mediate the Impact on Quality of Life of Early Morning Off in Parkinson's Disease
Source: Front Aging Neurosci. 2021 Aug 6;13:681773. doi: 10.3389/fnagi.2021.681773 (PMC8378267; doi:10.3389/fnagi.2021.681773)
Supplement: Supplementary file 1 [file Table_1.XLSX]

## Sheet: Sheet1
入组数目	PI	PI	单位	单位
1	刘振国	Zhenguo Liu	上海交通大学医学院附属新华医院	Department of Neurology, Xinhua Hospital, Affiliated to Shanghai JiaoTong University, School of Medicine，Shanghai, China	liuzhenguo@xinhuamed.com.cn
2	李文涛	Wentao Li	上海中医药大学附属市中医医院	Department of neurology, Shanghai municipal Hospital of Traditional Chinese Medicine， Shanghai University of Traditional Chinese Medicine ,Shanghai，China	lwt1132@163.com
3	黄东雅	Dongya Huang	同济大学附属东方医院	Department of Neurology, Shanghai East Hospital, Tongji University，Shanghai, China	dongyahuang77@hotmail.com
4	陈伟	Wei Chen	上海交通大学医学院附属第九人民医院	Department of Neurology, Shanghai Ninth People’s Hospital, Shanghai Jiao Tong University School of Medicine，Shanghai, China	david_chen8106@hotmail.com,
5	袁灿兴	Canxing Yuan	上海中医药大学附属龙华医院	Department of Neurology, Longhua Hospital Shanghai University of Traditional Chinese Medicine，Shanghai, China	18917763103@163.com
6	金丽蓉	Lirong Jin	复旦大学附属中山医院	Department of Neurology，Zhongshan hospital，Fudan University ，Shanghai, China	jinlr99@163.com
7	王宇卉	Yuhui Wang	上海市浦东新区浦南医院	Department of Neurology, Shanghai Punan Hospital，Shanghai, China	yhwangch@sina.com
8	靳令经	Lingjing Jin	同济大学附属同济医院	Department of Neurology, Tongji Hospital, Tongji University school of Medicine，Shanghai, China	lingjingjin@163.com
9	陆磊	Lu Lei	上海交通大学医学院附属第六人民医院	Department of neurology, Shanghai Jiao Tong University Affiliated Sixth People's Hospital, No.600, Yishan Road, Shanghai, China	lulei@hotail.com
10	王小平	Xiaoping Wang	上海交通大学医学院附属同仁医院	Department of Neurology, TongRen Hospital, Shanghai Jiao Tong University School of Medicine, Shanghai, China	x_p_wang@sjtu.edu.cn
11	王长德	Changde Wang	上海中医药大学附属上海市中西医结合医院	Department of neurology, Shanghai TCM-Integrated Hospital Affiliated to Shanghai University of TCM, Shanghai, China	wangch_de@163.com
12	赵晓晖	Xiaohui Zhao	上海市浦东新区人民医院	Department of Neurology, Shanghai Pudong New Area People’s Hospital，Shanghai, China	zhaoxh99990@sina.com
13	高山	Shan Gao	上海市奉贤区中心医院	Department of Neurology, Shanghai JiaoTong University affiliated the Sixth People Hospital, South Campus，Shanghai, China	gaoshanwater@163.com
14	赵轶	Yi Zhao	上海市徐汇区中心医院	Department of Neurology, Xuhui Center Hospital in Shanghai，Shanghai, China
15	黄立宏	Lihon Huang g	上海市静安区闸北中心医院	Department of Neurology, Zhabei Center hospital, Jiang’an District，Shanghai, China
16	赵延新	Yanxin Zhao	同济大学附属第十人民医院	Department of Neurology, Tenth People's Hospital Affiliated to Tongji University，Shanghai, China
17	王慧	Hui Wang	徐汇区大华医院	Department of Neurology, Dahua Hospital of Xu hui District，Shanghai, China
18	赵静	Jing Zhao	上海市闵行区中心医院	Department of Neurology, Minhang Center hospital, Fudan University，Shanghai, China
19	王枫	Feng Wang	上海市第七人民医院	Department of Neurology, Seventh People's Hospital of Shanghai University of Traditional Chinese Medicine, Shanghai, China
20	赵超蓉	Chaorong Zhao	上海市普陀区中医医院	Department of TCM , Shanghai Putuo District Hospital of Traditional Chinese Medicine，Shanghai, China
21	施德	De Shi	上海交通大学医学院附属新华医院崇明分院	Department of Neurology, Xinhua hospital Affiliated to Shanghai Jiaotong University School of Medicine,Chongming Branch，Shanghai, China
22	魏文石	Wenshi Wei	复旦大学附属华东医院	Department of Neurology, Huadong Hospital, Fudan University, Shanghai, China
23	侯晓军	Xiaojun Hou	海军军医大学附属长海医院	Department of Neurology, The Second Military Medical University affiliated Changhai Hospital，Shanghai, China	13311931663@163.com
24	罗国君	Guojun Luo	上海市第六人民医院金山分院	Department of Neurology, Jinshan Branch of Shanghai Sixth People's Hospital,Shanghai China.
25	李雯	Wen Li	上海市杨浦区控江医院	Department of Neurology, Kong Jiang Hospital of Yang pu district，Shanghai, China
26	刘军	Jun Liu	上海交通大学医学院附属瑞金医院	Department of Neurology, Ruijin Hospital, Affiliated to Shanghai Jiaotong University School of Medicine，Shanghai, China
27	王文昭	Wenzhao Wang	海军军医大学附属长征医院	Department of Neurology, Shanghai Changzheng Hospital，Shanghai, China
28	王建民	Ying Guan	上海市宝山区仁和医院	Department of Neurology, Renhe Hospital, Baoshan District，Shanghai, China
29	孙家兰	Jialan Sun	上海市浦东新区公利医院	Department of Neurology, Gongli Hospital, Pu Dong New Area，Shanghai, China
30	于峰	Feng Yu	上海市虹口区江湾医院	Department of Neurology, Jiangwan hospital, Hong kou district，Shanghai, China
31	吴卫文	Weiwen Wu	复旦大学附属上海中山医院青浦分院	Department of Neurology, Zhongshan Hospital Qingpu Branch, Fudan University，Shanghai, China
32	潘卫东	Weidong Pan	上海中医药大学附属曙光医院	Department of Neurology, ShuGuang Hospital Affiliated to Shanghai University of Traditional Chinese Medicine，Shanghai, China
33	毕涌	Yong Bi	上海市第四人民医院	Department of Neurology, Shanghai Fourth People’s Hospital Affiliated to Tongji University School of Medicine，Shanghai, China
34	向文海	Wenhai Xiang	上海市嘉定区南翔医院	Department of Neurology, Nanxiang Hospital, Jiading District, Shanghai, China
35	曾晖	Hui Zeng	上海市杨浦区中医医院	Department of Neurology, Shanghai Yangpu Hospital of Traditional Chinese Medicine，Shanghai, China
36	赵迎春	Yingchun Zhao	上海市松江区中心医院	Department of Neurology, Shanghai Songjiang District Central Hospital，Shanghai, China
37	杜芸兰	Yunlan Du	上海交通大学医学院附属仁济医院	Department of neurology, renji Hospital Affiliated to Shanghai Jiao Tong University School of Medicine, Shanghai, China
38	祖恒兵	Hengbing Zu	复旦大学附属金山医院	Department of neurology, Jinshan Hospital Affiliated to Fudan University, Shanghai, China
39	董青	Qing Dong	上海交通大学医学院附属仁济医院南院	Department of Neurology, Renji Hospital, South Campus, Affiliated to Shanghai Jiaotong University, School of Medicine，Shanghai, China
40	胡文舰	Chunmei Hu	上海市宝山区中西医结合医院	Department of neurology, Shanghai Baoshan Hospital of Integrated Traditional Chinese and Western Medicine, Shanghai, China

## Sheet: Sheet2
PI	Affiliation	Email
Zhenguo Liu	Department of Neurology, Xinhua Hospital, Affiliated to Shanghai JiaoTong University, School of Medicine，Shanghai, China	liuzhenguo@xinhuamed.com.cn
Wentao Li	Department of neurology, Shanghai municipal Hospital of Traditional Chinese Medicine，Shanghai University of Traditional Chinese Medicine ,Shanghai，China	lwt1132@163.com
Dongya Huang	Department of Neurology，East Hospital，Tongji University School of Medicine，Shanghai 200120，China	dongyahuang77@hotmail.com
Wei Chen	Department of Neurology, Shanghai Ninth People’s Hospital, Shanghai Jiao Tong University School of Medicine，Shanghai, China	david_chen8106@hotmail.com,
Canxing Yuan	Department of Neurology, Longhua Hospital Shanghai University of Traditional Chinese Medicine，Shanghai, China	18917763103@163.com
Lirong Jin	Department of Neurology，Zhongshan hospital，Fudan University ，Shanghai, China	jinlr99@163.com
Yuhui Wang	Department of Neurology, Shanghai Punan Hospital，Shanghai, China	yhwangch@sina.com
Lingjing Jin	Department of Neurology, Tongji Hospital, Tongji University school of Medicine，Shanghai, China	lingjingjin@163.com
Lu Lei	Department of neurology, Shanghai Jiao Tong University Affiliated Sixth People's Hospital, No.600, Yishan Road, Shanghai, China	lulei@hotail.com
Xiaoping Wang	Department of Neurology, TongRen Hospital, Shanghai Jiao Tong University School of Medicine, Shanghai, China	x_p_wang@sjtu.edu.cn
Changde Wang	Department of neurology, Shanghai TCM-Integrated Hospital Affiliated to Shanghai University of TCM, Shanghai, China	wangch_de@163.com
Xiaohui Zhao	Department of Neurology, Shanghai Pudong New Area People’s Hospital，Shanghai, China	zhaoxh99990@sina.com
Shan Gao	Department of Neurology, Shanghai JiaoTong University affiliated the Sixth People Hospital, South Campus，Shanghai, China	gaoshanwater@163.com
Yi Zhao	Department of Neurology, Xuhui Center Hospital in Shanghai，Shanghai, China	Luttyzhao@126.com
Lihong Huang	Department of Neurology, Zhabei Center hospital, Jiang’an District，Shanghai, China	brainh@126.com
Yanxin Zhao	Department of Neurology, Tenth People's Hospital Affiliated to Tongji University，Shanghai, China	zhao_yanxin@126.com
Hui Wang	Department of Neurology, Dahua Hospital of Xu hui District，Shanghai, China	wanghui71887722@163.com
Jing Zhao	Department of Neurology, Minhang Center hospital, Fudan University，Shanghai, China	zhaojingssmu@163.com
Feng Wang	Department of Neurology, Seventh People's Hospital of Shanghai University of Traditional Chinese Medicine, Shanghai, China	13816566556@163.com
Chaorong Zhao	Department of TCM , Shanghai Putuo District Hospital of Traditional Chinese Medicine，Shanghai, China	rongrongzcr@qq.com
De Shi	Department of Neurology, Xinhua hospital Affiliated to Shanghai Jiaotong University School of Medicine,Chongming Branch，Shanghai, China	shide1010@163.com
Wenshi Wei	Department of Neurology, Huadong Hospital, Fudan University, Shanghai, China	Wenshiwei1999@163.com
Xiaojun Hou	Department of Neurology, The Navy Medical University affiliated Changhai Hospital，Shanghai, China	13311931663@163.com
Guojun Luo	Department of Neurology, Jinshan Branch of Shanghai Sixth People's Hospital,Shanghai China.	junlgsy@163.com
Wen Li	Department of Neurology, Kong Jiang Hospital of Yang pu district，Shanghai, China	jjjtong67@163.com
Jun Liu	Department of Neurology, Ruijin Hospital, Affiliated to Shanghai Jiaotong University School of Medicine，Shanghai, China	jly0520@163.com
Wenzhao Wang	Department of Neurology, Shanghai Changzheng Hospital，Shanghai, China	wangwenzhao62@sina.com
Jianmin Wang	Department of Neurology, Renhe Hospital, Baoshan District，Shanghai, China	wjmsu27@163.com
Jialan Sun	Department of Neurology, Gongli Hospital, Pu Dong New Area，Shanghai, China	sjlmed@sina.com
Feng Yu	Department of Neurology, Jiangwan hospital, Hong kou district，Shanghai, China	yufeng1301@126.com
Weiwen Wu	Department of Neurology, Zhongshan Hospital Qingpu Branch, Fudan University，Shanghai, China	weiwenwu0609@163.com
Weidong Pan	Department of Neurology, ShuGuang Hospital Affiliated to Shanghai University of Traditional Chinese Medicine，Shanghai, China	panwd@medmail.com.cn
Yong Bi	Department of Neurology, Shanghai Fourth People’s Hospital Affiliated to Tongji University School of Medicine，Shanghai, China	aflame@126.com
Wenhai Xiang	Department of Neurology, Nanxiang Hospital, Jiading District, Shanghai, China	xwh75@163.com
Hui Zeng	Department of Neurology, Shanghai Yangpu Hospital of Traditional Chinese Medicine，Shanghai, China	1670288940@qq.com
Yingchun Zhao	Department of Neurology, Shanghai Songjiang District Central Hospital，Shanghai, China	zhaoyingchun9077@163.com
Yunlan Du	Department of neurology, renji Hospital Affiliated to Shanghai Jiao Tong University School of Medicine, Shanghai, China	yunlandu2013@163.com.cn
Hengbing Zu	Department of neurology, Jinshan Hospital Affiliated to Fudan University, Shanghai, China	hbzyy666@163.com
Qing Dong	Department of Neurology, Renji Hospital, South Campus, Affiliated to Shanghai Jiaotong University, School of Medicine，Shanghai, China	dnqn1969@qq.com
Wenjian Hu	Department of neurology, Shanghai Baoshan Hospital of Integrated Traditional Chinese and Western Medicine, Shanghai, China	726592156@qq.com
